# Supplementary material for: Entamoeba histolyticaandE. disparCalreticulin: Inhibition of Classical Complement Pathway and Differences in the Level of Expression in Amoebic Liver Abscess
Source: Hindawi journal article supplement (doi:10.1155/2014/127453), 2014-01-01
Supplement: f1 [file 127453.f1.pdf]

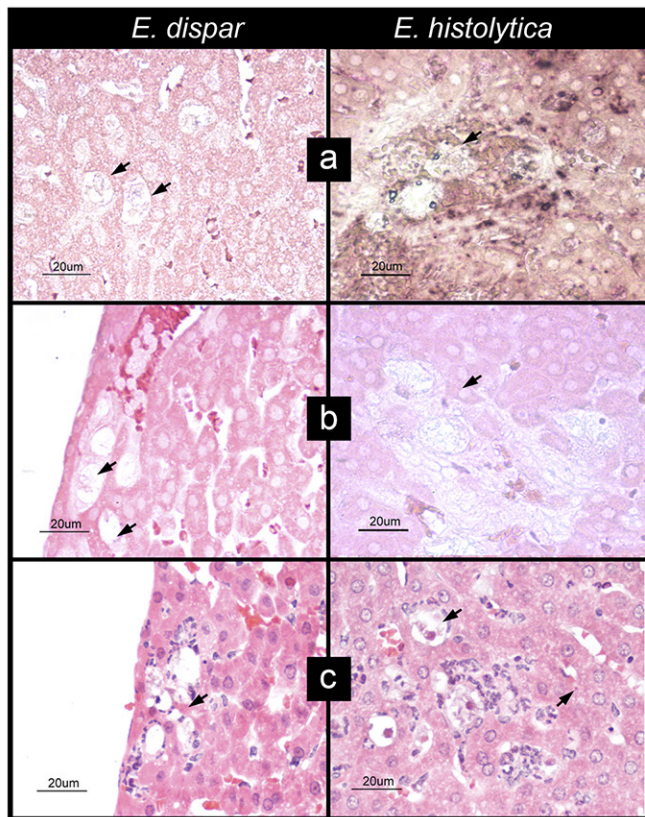

Figure 8A. . Immunohistochemical staining of *EhCRT* or *EdCRT* and C1q in situ.

Representative images of immunohistochemical detection of CRT and C1q in amoebic liver abscess sections of livers from hamsters inoculated with; *E. histolytica* HM1:IMSS virulent trophozoites; *E. dispar* SAW760 trophozoites and sacrificed at different times after inoculation 30 min (a,) and 3 h (b); (a, b) Tissue sections stained with Monoclonal mouse IgG1 antibody against *Aspergillus niger* glucose oxidase was used as the negative control. c) hematoxylin/eosin stain. The arrows point out some demonstrative trophozoites. Scale bar represents 20  $\mu\text{m}$ .

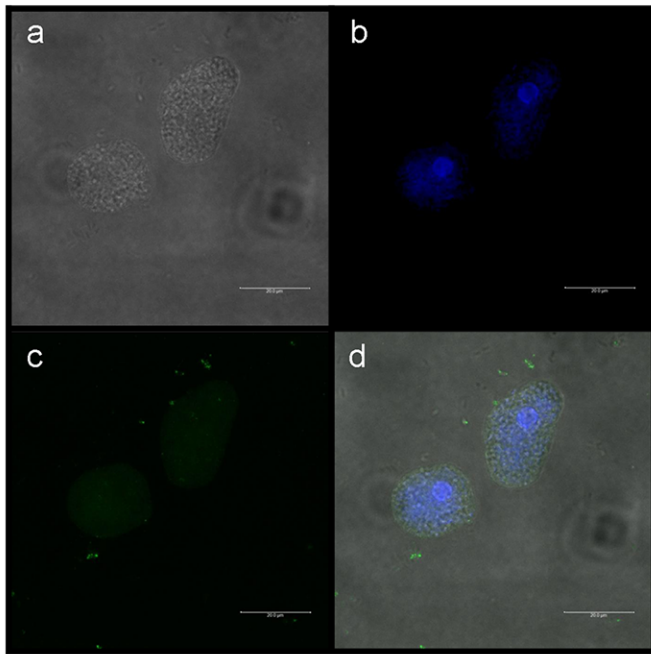

Figure 5A. Representative images of confocal microscopy assays: Co-location of *EhCRT* or *EdCRT* and human C1q. Here we shown the negative control when using *E. histolytica* trophozoites; a) Represent the differential interference contrast (DIC); b) preimmune mouse serum and trophozoite nucleus stained with DAPI; c) Trophozoites reacted with preimmune mouse serum and with anti-mouse Alexa-Fluor 488; d) Channel Merger. The micrographs showed the maximal projection of the z-series. Scale bar represents 20  $\mu\text{m}$ .
